# Supplementary material for: Antibody neutralization to SARS-CoV-2 and variants after one year in Wuhan
Source: bioRxiv or medRxiv preprint supplement (doi:10.1101/2021.06.16.21258673), 2021-06-21
Supplement: Supplementary file [file media-1.pdf]

Supplementary Information for:

## **Antibody neutralization to SARS-CoV-2 and variants after one year in Wuhan**

Qianyun Liu<sup>1, 5</sup>, Qing Xiong<sup>1, 5</sup>, Fanghua Mei<sup>2, 5</sup>, Chengbao Ma<sup>1</sup>, Zhen Zhang<sup>1</sup>, Bing Hu<sup>2</sup>, Junqiang Xu<sup>2</sup>, Yongzhong Jiang<sup>2</sup>, Faxian Zhan<sup>2</sup>, Xianying Chen<sup>1</sup>, Ming Guo<sup>1</sup>, Xin Wang<sup>1</sup>, Yaohui Fang<sup>3</sup>, Shu Shen<sup>3</sup>, Yingle Liu<sup>1</sup>, Fang Liu<sup>1</sup>, Li Zhou<sup>1</sup>, Ke Xu<sup>1</sup>, Changwen Ke<sup>4</sup>, Fei Deng<sup>3</sup>, Kun Cai<sup>2</sup>✉, Huan Yan<sup>1</sup> ✉, Yu Chen<sup>1</sup> ✉, Ke Lan<sup>1</sup> ✉

<sup>1</sup>State Key Laboratory of Virology, Institute for Vaccine Research and Modern Virology Research Center, College of Life Sciences, Wuhan University, Wuhan, China.

<sup>2</sup>Hubei Provincial Center for Disease Control and Prevention, Wuhan, China.

<sup>3</sup>National Virus Resource Center, Wuhan Institute of Virology, Chinese Academy of Sciences.

<sup>4</sup>Guangdong Provincial Center for Disease Control and Prevention, Guangzhou, China.

<sup>5</sup>These authors contributed equally: Qianyun Liu, Qing Xiong, Fanghua Mei

✉ e-mail: [ckreal@163.com](mailto:ckreal@163.com); [huanyan@whu.edu.cn](mailto:huanyan@whu.edu.cn); [chenyu@whu.edu.cn](mailto:chenyu@whu.edu.cn); [kulan@whu.edu.cn](mailto:kulan@whu.edu.cn)

**Extended data Fig. 1: The neutralizing activity of the convalescents' sera to WT-D614G and variants for NT<sub>50</sub> determination.**

**Extended data Table 1: The clinical records and sera reactivity to SARS-CoV-2 of the convalescents in this study.**

Extended data Fig. 1

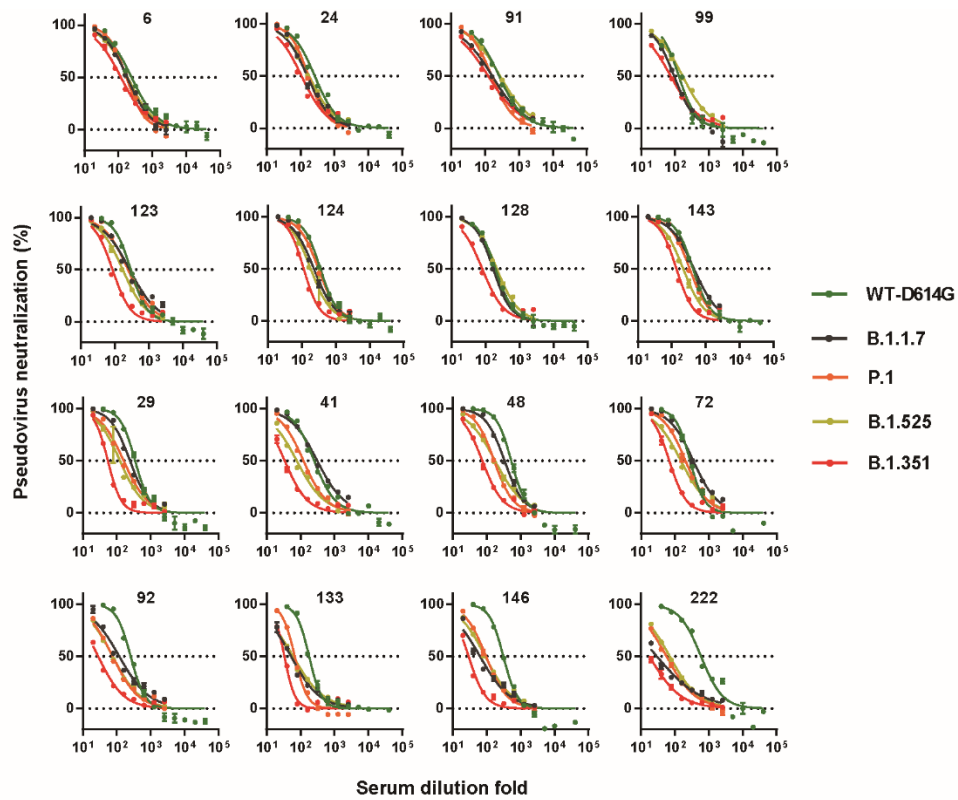

|               |     | NT <sub>50</sub> |         |              |        |         |
|---------------|-----|------------------|---------|--------------|--------|---------|
| sample number |     | WT-D614G         | England | South Africa | Brazil | Nigeria |
| Group 1       | 6   | 245.5            | 181.6   | 119.3        | 173.8  | 188.5   |
|               | 24  | 263              | 158.1   | 107.5        | 171.4  | 180.1   |
|               | 91  | 262.4            | 163.4   | 124.5        | 158.4  | 277.7   |
|               | 99  | 129              | 93.78   | 74.42        | 93.78  | 166.3   |
|               | 123 | 294              | 273     | 85.22        | 243.9  | 170.4   |
|               | 124 | 354.1            | 227.2   | 113.9        | 309.4  | 183.2   |
|               | 128 | 194.4            | 166.5   | 79.45        | 166.5  | 214.7   |
|               | 143 | 421.9            | 453.7   | 137.5        | 338.3  | 217.6   |
| Group 2       | 29  | 262.4            | 163.4   | 124.5        | 158.4  | 277.7   |
|               | 41  | 194.4            | 166.5   | 79.45        | 166.5  | 214.7   |
|               | 48  | 354.1            | 227.2   | 113.9        | 309.4  | 183.2   |
|               | 72  | 245.5            | 181.6   | 119.3        | 173.8  | 188.5   |
|               | 92  | 129              | 93.78   | 74.42        | 93.78  | 166.3   |
|               | 133 | 294              | 273     | 85.22        | 243.9  | 170.4   |
|               | 146 | 421.9            | 453.7   | 137.5        | 338.3  | 217.6   |
|               | 222 | 263              | 158.1   | 107.5        | 171.4  | 180.1   |

**Extended data Table 1:**

| Sample number | Gender | Age range | Illness severity | Anti-SARS-CoV-2-S IgM | Anti-SARS-CoV-2-S IgG | Anti-RBD IgG level (OD450) | Competitive ability of ACE2 to RBD binding (%) |
|---------------|--------|-----------|------------------|-----------------------|-----------------------|----------------------------|------------------------------------------------|
| 1             | male   | 35-39     | critical         | -                     | +                     | 0.954                      | 63.6%                                          |
| 2             | female | 40-44     | mild             | -                     | +                     | 0.498                      | 41.7%                                          |
| 3             | male   | 55-59     | mild             | -                     | -                     | 0.608                      | 36.2%                                          |
| 4             | female | above 74  | mild             | -                     | +                     | 0.773                      | 82.7%                                          |
| 5             | female | 70-74     | asymptomatic     | -                     | +                     | 0.606                      | 70.1%                                          |
| 6             | female | 65-69     | mild             | -                     | +                     | 0.83                       | 78.5%                                          |
| 7             | male   | 50-54     | mild             | -                     | +                     | 0.608                      | 32.0%                                          |
| 8             | female | 65-69     | mild             | -                     | +                     | 0.948                      | 87.9%                                          |
| 9             | female | 50-54     | mild             | -                     | +                     | 0.58                       | 40.4%                                          |
| 10            | male   | above 74  | normal           | -                     | +                     | 0.887                      | 71.5%                                          |
| 12            | male   | 35-39     | mild             | -                     | -                     | 0.549                      | 45.8%                                          |
| 13            | female | above 74  | mild             | -                     | -                     | 0.273                      | 5.5%                                           |
| 14            | female | 50-54     | normal           | -                     | +                     | 0.982                      | 66.6%                                          |
| 15            | male   | 65-69     | mild             | -                     | +                     | 0.849                      | 69.4%                                          |
| 16            | male   | 55-59     | normal           | -                     | +                     | 0.75                       | 49.6%                                          |
| 17            | female | 70-74     | mild             | -                     | +                     | 0.9                        | 78.1%                                          |
| 18            | female | 55-59     | severe           | -                     | +                     | 0.794                      | 80.2%                                          |
| 19            | male   | 60-64     | mild             | -                     | +                     | 0.374                      | 32.3%                                          |
| 20            | female | 65-69     | severe           | -                     | +                     | 1.224                      | 92.7%                                          |
| 21            | female | 35-39     | mild             | -                     | +                     | 0.692                      | 64.6%                                          |
| 22            | female | 60-64     | mild             | -                     | +                     | 0.8                        | 86.6%                                          |
| 23            | male   | 65-69     | severe           | -                     | +                     | 1.017                      | 84.4%                                          |
| 24            | male   | above 74  | mild             | -                     | +                     | 1.118                      | 86.7%                                          |
| 25            | female | 60-64     | mild             | -                     | +                     | 1.145                      | 94.7%                                          |
| 26            | male   | 35-39     | mild             | -                     | +                     | 0.551                      | 40.0%                                          |
| 27            | female | 70-74     | mild             | -                     | +                     | 1.188                      | 93.3%                                          |
| 28            | female | 60-64     | normal           | -                     | +                     | 1.191                      | 95.8%                                          |
| 29            | female | 60-64     | mild             | -                     | +                     | 1.367                      | 97.1%                                          |
| 30            | female | 60-64     | asymptomatic     | -                     | +                     | 1.117                      | 87.2%                                          |
| 31            | male   | 65-69     | severe           | -                     | +                     | 0.784                      | 70.5%                                          |
| 32            | male   | 60-64     | severe           | -                     | +                     | 0.664                      | 63.5%                                          |
| 33            | female | 65-69     | mild             | -                     | +                     | 0.763                      | 76.8%                                          |
| 34            | male   | 65-69     | normal           | -                     | +                     | 0.927                      | 80.3%                                          |
| 35            | female | 60-64     | normal           | -                     | +                     | 1.425                      | 96.7%                                          |
| 36            | male   | 65-69     | severe           | -                     | +                     | 0.971                      | 73.6%                                          |
| 37            | female | 70-74     | mild             | -                     | +                     | 1.375                      | 96.8%                                          |
| 38            | male   | 40-44     | normal           | -                     | -                     | 0.458                      | 48.7%                                          |
| 39            | female | 55-59     | normal           | -                     | +                     | 0.954                      | 86.5%                                          |
| 40            | male   | 35-39     | normal           | -                     | -                     | 0.179                      | 15.5%                                          |
| 41            | female | 70-74     | normal           | -                     | +                     | 1.166                      | 77.4%                                          |
| 42            | female | 60-64     | severe           | -                     | +                     | 0.697                      | 50.2%                                          |
| 43            | female | 50-54     | mild             | -                     | +                     | 0.754                      | 60.8%                                          |
| 44            | male   | 65-69     | severe           | -                     | +                     | 1.161                      | 86.3%                                          |
| 45            | male   | above 74  | severe           | -                     | +                     | 0.432                      | 38.8%                                          |
| 46            | female | 55-59     | normal           | -                     | +                     | 1.151                      | 88.5%                                          |
| 47            | male   | 55-59     | normal           | -                     | +                     | 0.901                      | 77.6%                                          |
| 48            | female | 55-59     | mild             | -                     | +                     | 1.293                      | 96.7%                                          |
| 49            | female | 50-54     | normal           | -                     | +                     | 1.327                      | 93.4%                                          |
| 50            | male   | 70-74     | normal           | -                     | -                     | 0.275                      | 21.3%                                          |
| 51            | female | 45-49     | severe           | -                     | +                     | 0.782                      | 60.8%                                          |
| 52            | male   | 55-59     | severe           | -                     | +                     | 1.17                       | 92.1%                                          |
| 53            | male   | 70-74     | severe           | -                     | +                     | 0.402                      | 31.4%                                          |
| 54            | female | 65-69     | mild             | -                     | +                     | 0.458                      | 29.1%                                          |
| 55            | female | 65-69     | severe           | -                     | +                     | 0.632                      | 62.6%                                          |
| 56            | female | 40-44     | normal           | -                     | +                     | 1.378                      | 97.1%                                          |
| 57            | male   | 45-49     | severe           | -                     | -                     | 0.339                      | 32.4%                                          |
| 58            | male   | 55-59     | mild             | -                     | +                     | 1.081                      | 92.7%                                          |
| 59            | male   | 20-29     | asymptomatic     | -                     | -                     | 0.125                      | 17.0%                                          |
| 60            | male   | 65-69     | normal           | -                     | +                     | 1.328                      | 96.3%                                          |
| 61            | female | 60-64     | critical         | -                     | -                     | 0.689                      | 64.6%                                          |
| 62            | male   | 55-59     | severe           | -                     | +                     | 1.092                      | 77.7%                                          |
| 63            | female | 60-64     | normal           | -                     | +                     | 0.866                      | 81.6%                                          |
| 64            | female | 60-64     | mild             | -                     | -                     | 0.546                      | 38.2%                                          |

| Sample number | Gender | Age range | Illness severity | Anti-SARS-CoV-2-S IgM | Anti-SARS-CoV-2-S IgG | Anti-RBD IgG level (OD450) | Competitive ability of ACE2 to RBD binding (%) |
|---------------|--------|-----------|------------------|-----------------------|-----------------------|----------------------------|------------------------------------------------|
| 65            | female | 60-64     | severe           | -                     | +                     | 0.89                       | 71.6%                                          |
| 66            | female | 55-59     | normal           | -                     | +                     | 0.763                      | 65.1%                                          |
| 67            | female | 55-59     | severe           | -                     | +                     | 0.743                      | 64.7%                                          |
| 68            | male   | above 74  | mild             | -                     | +                     | 0.847                      | 63.4%                                          |
| 69            | male   | 30-34     | normal           | -                     | +                     | 0.531                      | 56.0%                                          |
| 70            | male   | 70-74     | normal           | -                     | +                     | 0.967                      | 76.5%                                          |
| 71            | female | 70-74     | normal           | -                     | +                     | 0.667                      | 51.6%                                          |
| 72            | female | 40-44     | normal           | -                     | +                     | 1.293                      | 94.3%                                          |
| 73            | male   | 50-54     | mild             | -                     | +                     | 0.254                      | 12.4%                                          |
| 74            | female | 50-54     | normal           | -                     | -                     | 0.199                      | 18.9%                                          |
| 75            | male   | 55-59     | severe           | -                     | +                     | 0.544                      | 63.4%                                          |
| 76            | male   | 65-69     | normal           | -                     | +                     | 0.351                      | 40.5%                                          |
| 77            | female | 20-29     | mild             | -                     | -                     | 0.376                      | 35.8%                                          |
| 78            | female | 65-69     | mild             | -                     | +                     | 1.044                      | 83.0%                                          |
| 79            | male   | 50-54     | mild             | -                     | +                     | 0.211                      | 56.6%                                          |
| 80            | female | 55-59     | normal           | -                     | +                     | 0.763                      | 83.8%                                          |
| 81            | female | 65-69     | mild             | -                     | +                     | 0.726                      | 56.2%                                          |
| 82            | female | 60-64     | mild             | -                     | +                     | 0.606                      | 47.4%                                          |
| 83            | female | 55-59     | normal           | -                     | +                     | 1.146                      | 66.8%                                          |
| 84            | male   | 45-49     | mild             | -                     | +                     | 0.672                      | 48.3%                                          |
| 85            | female | 45-49     | normal           | -                     | -                     | 0.401                      | 46.5%                                          |
| 86            | male   | 60-64     | severe           | -                     | +                     | 0.616                      | 47.5%                                          |
| 87            | female | 45-49     | mild             | +                     | +                     | 1.467                      | 94.9%                                          |
| 88            | male   | 45-49     | normal           | -                     | -                     | 0.429                      | 33.3%                                          |
| 89            | female | 50-54     | mild             | -                     | +                     | 0.925                      | 69.5%                                          |
| 90            | female | 50-54     | normal           | -                     | +                     | 0.855                      | 76.9%                                          |
| 91            | male   | 55-59     | mild             | +                     | +                     | 0.901                      | 65.7%                                          |
| 92            | female | 55-59     | critical         | -                     | +                     | 1.058                      | 96.7%                                          |
| 93            | female | 50-54     | mild             | -                     | +                     | 1.326                      | 96.4%                                          |
| 94            | male   | 55-59     | normal           | -                     | +                     | 0.837                      | 92.3%                                          |
| 95            | male   | 55-59     | severe           | -                     | +                     | 1.272                      | 95.0%                                          |
| 96            | female | 50-54     | normal           | -                     | +                     | 0.683                      | 34.2%                                          |
| 97            | male   | 20-29     | mild             | -                     | +                     | 0.826                      | 60.2%                                          |
| 98            | male   | 55-59     | severe           | -                     | +                     | 1.008                      | 90.3%                                          |
| 99            | female | 60-64     | mild             | -                     | +                     | 0.378                      | 53.2%                                          |
| 100           | female | 50-54     | normal           | -                     | +                     | 0.223                      | 17.0%                                          |
| 101           | male   | 40-44     | normal           | -                     | -                     | 0.638                      | 24.6%                                          |
| 102           | female | 45-49     | normal           | -                     | -                     | 0.546                      | 43.0%                                          |
| 103           | female | 55-59     | asymptomatic     | -                     | -                     | 0.376                      | 4.2%                                           |
| 104           | male   | 50-54     | severe           | -                     | +                     | 0.908                      | 82.1%                                          |
| 105           | female | 50-54     | normal           | -                     | +                     | 0.686                      | 59.4%                                          |
| 106           | male   | 40-44     | critical         | +                     | +                     | 0.46                       | 30.6%                                          |
| 107           | female | 40-44     | normal           | -                     | +                     | 0.777                      | 54.6%                                          |
| 108           | male   | 65-69     | mild             | -                     | +                     | 1.136                      | 88.5%                                          |
| 109           | male   | 20-29     | mild             | -                     | +                     | 0.983                      | 80.5%                                          |
| 110           | male   | 60-64     | mild             | -                     | +                     | 0.731                      | 19.6%                                          |
| 111           | female | 65-69     | normal           | -                     | +                     | 0.721                      | 35.6%                                          |
| 112           | female | 35-39     | severe           | -                     | +                     | 0.516                      | 21.7%                                          |
| 113           | male   | 55-59     | mild             | -                     | +                     | 1.041                      | 83.3%                                          |
| 115           | female | 20-29     | mild             | -                     | -                     | 0.58                       | 61.4%                                          |
| 116           | male   | 55-59     | severe           | -                     | -                     | 0.49                       | 38.0%                                          |
| 117           | male   | 55-59     | mild             | -                     | -                     | 0.624                      | 39.8%                                          |
| 118           | female | 65-69     | mild             | -                     | +                     | 0.051                      | 62.6%                                          |
| 119           | female | 35-39     | mild             | -                     | +                     | 0.989                      | 16.8%                                          |
| 120           | female | 65-69     | severe           | -                     | +                     | 0.936                      | 88.8%                                          |
| 121           | female | 50-54     | normal           | -                     | +                     | 0.664                      | 76.6%                                          |
| 122           | female | 20-29     | mild             | -                     | +                     | 0.829                      | 85.1%                                          |
| 123           | female | 50-54     | normal           | -                     | +                     | 0.919                      | 95.6%                                          |
| 124           | male   | 55-59     | mild             | -                     | +                     | 1.184                      | 96.3%                                          |
| 125           | male   | 60-64     | normal           | -                     | +                     | 0.58                       | 43.0%                                          |
| 126           | male   | 65-69     | normal           | -                     | -                     | 0.242                      | 21.4%                                          |
| 127           | male   | 60-64     | normal           | -                     | +                     | 0.512                      | 46.0%                                          |
| 128           | female | 65-69     | normal           | -                     | +                     | 0.82                       | 74.6%                                          |
| 129           | male   | 60-64     | mild             | -                     | -                     | 0.125                      | 2.2%                                           |
| 130           | male   | 60-64     | severe           | -                     | +                     | 0.729                      | 49.0%                                          |
| 131           | male   | 70-74     | mild             | -                     | -                     | 0.322                      | 13.6%                                          |

| Sample number | Gender | Age range | Illness severity | Anti-SARS-CoV-2-S IgM | Anti-SARS-CoV-2-S IgG | Anti-RBD IgG level (OD450) | Competitive ability of ACE2 to RBD binding (%) |
|---------------|--------|-----------|------------------|-----------------------|-----------------------|----------------------------|------------------------------------------------|
| 132           | female | 70-74     | mild             | -                     | +                     | 0.642                      | 60.5%                                          |
| 133           | male   | 70-74     | mild             | -                     | +                     | 1.068                      | 50.5%                                          |
| 134           | male   | 50-54     | normal           | -                     | +                     | 0.702                      | 61.2%                                          |
| 135           | female | 55-59     | mild             | -                     | -                     | 0.47                       | 42.2%                                          |
| 136           | male   | 45-49     | mild             | -                     | -                     | 0.246                      | 15.1%                                          |
| 137           | female | 55-59     | normal           | -                     | -                     | 0.894                      | 53.6%                                          |
| 138           | female | 65-69     | mild             | -                     | +                     | 0.935                      | 60.5%                                          |
| 139           | male   | 30-34     | mild             | -                     | +                     | 0.318                      | 21.4%                                          |
| 140           | male   | 60-64     | normal           | -                     | +                     | 1.024                      | 72.8%                                          |
| 141           | male   | 35-39     | normal           | -                     | -                     | 0.549                      | 46.4%                                          |
| 142           | female | 40-44     | normal           | -                     | +                     | 1.18                       | 94.4%                                          |
| 143           | female | 65-69     | mild             | -                     | +                     | 1.191                      | 95.5%                                          |
| 144           | female | 60-64     | normal           | -                     | +                     | 0.376                      | 15.1%                                          |
| 145           | male   | 60-64     | mild             | -                     | -                     | 0.727                      | 62.6%                                          |
| 146           | female | 55-59     | mild             | -                     | +                     | 1.177                      | 96.8%                                          |
| 147           | female | 65-69     | severe           | -                     | +                     | 0.788                      | 79.7%                                          |
| 148           | female | 55-59     | mild             | -                     | +                     | 1.15                       | 96.1%                                          |
| 149           | female | 50-54     | normal           | -                     | -                     | 0.219                      | 13.0%                                          |
| 150           | female | 30-34     | mild             | -                     | +                     | 0.553                      | 47.4%                                          |
| 151           | male   | 40-44     | severe           | -                     | +                     | 0.64                       | 79.0%                                          |
| 152           | male   | 60-64     | mild             | -                     | +                     | 0.8                        | 70.5%                                          |
| 153           | male   | 60-64     | asymptomatic     | -                     | +                     | 0.265                      | 22.0%                                          |
| 154           | male   | 30-34     | normal           | -                     | +                     | 0.598                      | 49.4%                                          |
| 155           | female | 40-44     | normal           | -                     | +                     | 1.12                       | 94.0%                                          |
| 156           | female | 55-59     | normal           | -                     | -                     | 0.234                      | 40.1%                                          |
| 157           | female | 20-29     | mild             | -                     | +                     | 1.186                      | 96.3%                                          |
| 158           | male   | 30-34     | mild             | -                     | -                     | 0.806                      | 55.4%                                          |
| 159           | female | 55-59     | mild             | -                     | +                     | 0.614                      | 45.3%                                          |
| 160           | female | 55-59     | normal           | -                     | +                     | 0.956                      | 79.6%                                          |
| 161           | male   | above 74  | mild             | -                     | -                     | 0.591                      | 61.6%                                          |
| 162           | female | above 74  | normal           | -                     | +                     | 0.516                      | 46.0%                                          |
| 163           | female | 70-74     | mild             | +                     | +                     | 0.411                      | 45.7%                                          |
| 164           | female | 65-69     | normal           | -                     | +                     | 0.805                      | 77.9%                                          |
| 165           | male   | 70-74     | severe           | -                     | +                     | 0.476                      | 31.6%                                          |
| 166           | female | 70-74     | critical         | -                     | +                     | 0.86                       | 74.5%                                          |
| 167           | female | 60-64     | severe           | -                     | +                     | 0.585                      | 52.2%                                          |
| 168           | female | 45-49     | critical         | -                     | +                     | 0.277                      | 12.0%                                          |
| 169           | female | 40-44     | mild             | -                     | +                     | 1.053                      | 80.1%                                          |
| 170           | male   | 65-69     | severe           | -                     | +                     | 0.478                      | 31.1%                                          |
| 171           | female | 65-69     | severe           | -                     | +                     | 0.361                      | 22.8%                                          |
| 172           | male   | 40-44     | severe           | -                     | +                     | 0.688                      | 34.7%                                          |
| 173           | male   | above 74  | normal           | -                     | +                     | 0.598                      | 33.2%                                          |
| 174           | male   | 65-69     | mild             | -                     | +                     | 0.316                      | 17.8%                                          |
| 175           | male   | 65-69     | mild             | -                     | +                     | 0.751                      | 77.4%                                          |
| 176           | female | 65-69     | mild             | -                     | +                     | 0.706                      | 55.6%                                          |
| 177           | female | 70-74     | mild             | -                     | +                     | 1.218                      | 79.5%                                          |
| 178           | female | 70-74     | mild             | -                     | +                     | 1.064                      | 54.0%                                          |
| 179           | male   | 30-34     | mild             | -                     | +                     | 0.68                       | 29.9%                                          |
| 180           | female | 55-59     | normal           | -                     | +                     | 1.335                      | 78.7%                                          |
| 181           | male   | 70-74     | severe           | -                     | -                     | 0.259                      | 0.0%                                           |
| 182           | female | 60-64     | normal           | -                     | +                     | 1.451                      | 62.8%                                          |
| 183           | female | above 74  | normal           | -                     | +                     | 0.799                      | 23.5%                                          |
| 184           | male   | 50-54     | mild             | -                     | +                     | 0.604                      | 10.7%                                          |
| 185           | male   | 65-69     | normal           | -                     | +                     | 1.641                      | 80.7%                                          |
| 186           | male   | 55-59     | mild             | -                     | +                     | 0.638                      | 27.2%                                          |
| 187           | female | 65-69     | normal           | -                     | -                     | 0.481                      | 16.0%                                          |
| 188           | male   | 35-39     | mild             | -                     | +                     | 0.607                      | 40.7%                                          |
| 189           | male   | 60-64     | severe           | -                     | +                     | 1.106                      | 67.7%                                          |
| 190           | female | 60-64     | normal           | -                     | +                     | 0.828                      | 58.2%                                          |
| 191           | male   | 60-64     | critical         | -                     | -                     | 0.79                       | 33.4%                                          |
| 192           | male   | 50-54     | normal           | -                     | +                     | 0.775                      | 45.0%                                          |
| 193           | female | 50-54     | mild             | -                     | +                     | 0.65                       | 9.7%                                           |
| 194           | male   | 30-34     | normal           | -                     | +                     | 0.801                      | 40.3%                                          |
| 195           | male   | 35-39     | mild             | -                     | -                     | 0.331                      | 0.0%                                           |
| 196           | male   | 70-74     | mild             | -                     | +                     | 1.267                      | 63.9%                                          |
| 197           | female | 65-69     | severe           | -                     | -                     | 0.2                        | 2.8%                                           |

| Sample number | Gender | Age range | Illness severity | Anti-SARS-CoV-2-S IgM | Anti-SARS-CoV-2-S IgG | Anti-RBD IgG level (OD450) | Competitive ability of ACE2 to RBD binding (%) |
|---------------|--------|-----------|------------------|-----------------------|-----------------------|----------------------------|------------------------------------------------|
| 198           | female | 55-59     | normal           | -                     | +                     | 1.692                      | 88.9%                                          |
| 199           | female | 20-29     | normal           | -                     | +                     | 0.783                      | 23.0%                                          |
| 200           | male   | 60-64     | severe           | -                     | +                     | 1.204                      | 73.8%                                          |
| 201           | male   | 60-64     | severe           | -                     | +                     | 0.942                      | 55.6%                                          |
| 202           | female | 60-64     | mild             | -                     | +                     | 0.879                      | 47.9%                                          |
| 203           | female | 60-64     | critical         | -                     | +                     | 1.256                      | 87.1%                                          |
| 204           | male   | 30-34     | severe           | -                     | +                     | 1.028                      | 70.9%                                          |
| 205           | female | 60-64     | critical         | -                     | +                     | 0.716                      | 45.7%                                          |
| 206           | male   | 65-69     | normal           | -                     | +                     | 0.826                      | 65.3%                                          |
| 207           | male   | 65-69     | severe           | -                     | +                     | 0.969                      | 83.5%                                          |
| 208           | female | above 74  | mild             | -                     | -                     | 0.354                      | 30.4%                                          |
| 209           | female | 65-69     | mild             | -                     | -                     | 0.499                      | 16.3%                                          |
| 210           | female | 60-64     | severe           | -                     | +                     | 0.932                      | 59.5%                                          |
| 211           | female | 55-59     | severe           | -                     | -                     | 0.717                      | 41.1%                                          |
| 212           | female | 35-39     | normal           | -                     | +                     | 0.772                      | 54.0%                                          |
| 213           | male   | 55-59     | asymptomatic     | -                     | +                     | 1.362                      | 92.1%                                          |
| 214           | female | 60-64     | normal           | -                     | +                     | 1.503                      | 84.7%                                          |
| 215           | female | 65-69     | mild             | -                     | +                     | 0.964                      | 43.3%                                          |
| 216           | male   | 65-69     | critical         | -                     | -                     | 0.825                      | 21.7%                                          |
| 217           | male   | 65-69     | severe           | -                     | +                     | 1.321                      | 67.6%                                          |
| 218           | female | 65-69     | normal           | -                     | +                     | 1.226                      | 83.0%                                          |
| 219           | male   | 65-69     | normal           | -                     | +                     | 1.181                      | 78.7%                                          |
| 220           | male   | 60-64     | severe           | -                     | -                     | 0.471                      | 31.5%                                          |
| 221           | female | 30-34     | mild             | -                     | -                     | 0.845                      | 53.5%                                          |
| 222           | male   | 65-69     | normal           | -                     | +                     | 1.597                      | 92.2%                                          |
| 223           | male   | 65-69     | normal           | -                     | +                     | 1.387                      | 86.9%                                          |
| 224           | male   | 70-74     | severe           | -                     | +                     | 0.97                       | 76.3%                                          |
| 225           | female | 70-74     | normal           | -                     | +                     | 0.668                      | 47.6%                                          |
| 226           | female | 65-69     | mild             | -                     | +                     | 0.553                      | 52.5%                                          |
| 227           | male   | 70-74     | mild             | -                     | -                     | 0.975                      | 63.5%                                          |
| 228           | female | above 74  | asymptomatic     | -                     | +                     | 0.739                      | 68.3%                                          |
| 229           | male   | 65-69     | severe           | -                     | +                     | 0.871                      | 87.8%                                          |
| 230           | male   | 55-59     | asymptomatic     | -                     | +                     | 0.752                      | 40.2%                                          |
| 231           | male   | 30-34     | normal           | -                     | -                     | 0.952                      | 53.6%                                          |
| 232           | male   | above 74  | mild             | -                     | +                     | 0.451                      | 1.9%                                           |
| 233           | female | 55-59     | mild             | -                     | +                     | 0.733                      | 45.6%                                          |
| 234           | male   | 65-69     | mild             | -                     | -                     | 0.558                      | 21.1%                                          |
| 235           | female | 40-44     | mild             | -                     | -                     | 0.237                      | 0.0%                                           |
| 236           | male   | 20-29     | normal           | -                     | -                     | 0.185                      | 0.9%                                           |
| 237           | male   | 50-54     | normal           | -                     | +                     | 0.775                      | 72.8%                                          |
| 238           | male   | 45-49     | mild             | -                     | +                     | 1.152                      | 84.6%                                          |
| 239           | male   | 70-74     | mild             | +                     | +                     | 1.245                      | 82.6%                                          |
| 240           | female | 70-74     | mild             | -                     | +                     | 0.695                      | 52.9%                                          |
| 241           | male   | 60-64     | normal           | -                     | -                     | 0.23                       | 12.8%                                          |
| 242           | female | 20-29     | mild             | -                     | +                     | 1.354                      | 95.6%                                          |
| 243           | female | 60-64     | mild             | -                     | -                     | 0.218                      | 10.2%                                          |
| 244           | male   | 70-74     | mild             | -                     | +                     | 0.914                      | 63.0%                                          |
| 245           | male   | 45-49     | mild             | -                     | +                     | 0.524                      | 25.8%                                          |
| 246           | male   | 60-64     | mild             | -                     | +                     | 0.735                      | 45.7%                                          |
| 247           | female | 60-64     | mild             | -                     | +                     | 0.866                      | 48.6%                                          |
| 248           | female | above 74  | normal           | -                     | -                     | 0.119                      | 0.0%                                           |
| 249           | male   | 60-64     | normal           | -                     | +                     | 0.792                      | 71.5%                                          |
| 250           | female | 70-74     | mild             | -                     | +                     | 1.081                      | 86.3%                                          |
| NC-1          | male   | 30-34     | uninfected       | -                     | -                     | 0.119                      | untested                                       |
| NC-2          | male   | 30-34     | uninfected       | -                     | -                     | 0.178                      | untested                                       |
| NC-3          | male   | 20-29     | uninfected       | -                     | -                     | 0.124                      | untested                                       |
| NC-4          | female | 20-29     | uninfected       | -                     | -                     | 0.201                      | untested                                       |
| NC-5          | female | 20-29     | uninfected       | -                     | -                     | 0.048                      | untested                                       |
| NC-6          | male   | 35-39     | uninfected       | -                     | -                     | 0.175                      | untested                                       |
| NC-7          | female | 40-44     | uninfected       | -                     | -                     | 0.101                      | untested                                       |
| NC-8          | female | 55-59     | uninfected       | -                     | -                     | 0.243                      | untested                                       |
| NC-9          | female | 60-64     | uninfected       | -                     | -                     | 0.153                      | untested                                       |
| NC-10         | male   | 45-49     | uninfected       | -                     | -                     | 0.13                       | untested                                       |
